# Supplementary material
Source: ML conference proceedings conference paper supplement (https://openreview.net/forum?id=jSXsRwdux_)
Supplement: supplementary_material [file attachment]

# SUPPLEMENTARY MATERIAL OF GPR-NET: MULTI-VIEW LAYOUT ESTIMATION VIA A GEOMETRY-AWARE PANORAMA REGISTRATION NETWORK

**Anonymous authors**

Paper under double-blind review

We show visual comparisons with other competing methods. The first column shows two input panoramas with their estimated layouts. The remaining columns show the ground-truth layout, our layouts, LED<sup>2</sup>-Net’s layouts, and LGT-Net’s layouts in **blue**, **green**, **yellow**, **red**, respectively.

|                                                                                     |                                                                                     |                                                                                      |                                                                                       |
|-------------------------------------------------------------------------------------|-------------------------------------------------------------------------------------|--------------------------------------------------------------------------------------|---------------------------------------------------------------------------------------|
|    | 2D IoU: 0.9209, 3D IoU: 0.9052                                                      | 2D IoU: 0.5245, 3D IoU: 0.5178                                                       | 2D IoU: 0.8069, 3D IoU: 0.8046                                                        |
|                                                                                     |    |     |    |
|   | 2D IoU: 0.9234, 3D IoU: 0.9167                                                      | 2D IoU: 0.7580, 3D IoU: 0.7476                                                       | 2D IoU: 0.6197, 3D IoU: 0.5998                                                        |
|                                                                                     |  |  |  |
|  | 2D IoU: 0.9210, 3D IoU: 0.9136                                                      | 2D IoU: 0.6757, 3D IoU: 0.6731                                                       | 2D IoU: 0.6824, 3D IoU: 0.6757                                                        |
|                                                                                     |  |   |  |
|  | 2D IoU: 0.9335, 3D IoU: 0.9239                                                      | 2D IoU: 0.5823, 3D IoU: 0.5822                                                       | 2D IoU: 0.6157, 3D IoU: 0.6098                                                        |
|                                                                                     |  |   |  |
| Input                                                                               | Ours                                                                                | LED <sup>2</sup> -Net                                                                | LGT-Net                                                                               |

## REFERENCES

|                                                                                     |                                                                                     |                                                                                     |                                                                                       |
|-------------------------------------------------------------------------------------|-------------------------------------------------------------------------------------|-------------------------------------------------------------------------------------|---------------------------------------------------------------------------------------|
|    | 2D IoU: 0.9276, 3D IoU: 0.9255                                                      | 2D IoU: 0.6837, 3D IoU: 0.6752                                                      | 2D IoU: 0.6495, 3D IoU: 0.6332                                                        |
|                                                                                     |    |   |    |
|    | 2D IoU: 0.9237, 3D IoU: 0.9204                                                      | 2D IoU: 0.5119, 3D IoU: 0.5102                                                      | 2D IoU: 0.5617, 3D IoU: 0.5598                                                        |
|                                                                                     |    |    |    |
|   | 2D IoU: 0.9297, 3D IoU: 0.9253                                                      | 2D IoU: 0.6960, 3D IoU: 0.6960                                                      | 2D IoU: 0.6776, 3D IoU: 0.6582                                                        |
|                                                                                     |  |  |  |
|  | 2D IoU: 0.9457, 3D IoU: 0.9168                                                      | 2D IoU: 0.7174, 3D IoU: 0.7103                                                      | 2D IoU: 0.7557, 3D IoU: 0.7433                                                        |
|                                                                                     |  |  |  |
|  | 2D IoU: 0.9327, 3D IoU: 0.9262                                                      | 2D IoU: 0.5784, 3D IoU: 0.5759                                                      | 2D IoU: 0.5920, 3D IoU: 0.5904                                                        |
|                                                                                     |  |  |  |
| Input                                                                               | Ours                                                                                | LED <sup>2</sup> -Net                                                               | LGT-Net                                                                               |



|                                                                                     |                                                                                     |                                                                                      |                                                                                       |
|-------------------------------------------------------------------------------------|-------------------------------------------------------------------------------------|--------------------------------------------------------------------------------------|---------------------------------------------------------------------------------------|
|   | 2D IoU: 0.9250, 3D IoU: 0.8778                                                      | 2D IoU: 0.7412, 3D IoU: 0.7172                                                       | 2D IoU: 0.6755, 3D IoU: 0.6634                                                        |
|                                                                                     |    |     |    |
|                                                                                     | 2D IoU: 0.9331, 3D IoU: 0.9248                                                      | 2D IoU: 0.7391, 3D IoU: 0.7342                                                       | 2D IoU: 0.3457, 3D IoU: 0.3439                                                        |
|                                                                                     |    |     |    |
|                                                                                     | 2D IoU: 0.9313, 3D IoU: 0.9101                                                      | 2D IoU: 0.6832, 3D IoU: 0.6652                                                       | 2D IoU: 0.6759, 3D IoU: 0.6703                                                        |
|                                                                                     |  |  |  |
|  | 2D IoU: 0.9441, 3D IoU: 0.9238                                                      | 2D IoU: 0.5922, 3D IoU: 0.5841                                                       | 2D IoU: 0.5837, 3D IoU: 0.5826                                                        |
|                                                                                     |  |   |  |
|                                                                                     | 2D IoU: 0.9261, 3D IoU: 0.9094                                                      | 2D IoU: 0.8905, 3D IoU: 0.8872                                                       | 2D IoU: 0.9048, 3D IoU: 0.9012                                                        |
|                                                                                     |  |   |  |
|                                                                                     |                                                                                     |                                                                                      |                                                                                       |
|                                                                                     |                                                                                     |                                                                                      |                                                                                       |
| Input                                                                               | Ours                                                                                | LED <sup>2</sup> -Net                                                                | LGT-Net                                                                               |

|                                                                                     |                                                                                     |                                                                                     |                                                                                       |                                |
|-------------------------------------------------------------------------------------|-------------------------------------------------------------------------------------|-------------------------------------------------------------------------------------|---------------------------------------------------------------------------------------|--------------------------------|
|    | 2D IoU: 0.9231, 3D IoU: 0.9054                                                      |                                                                                     | 2D IoU: 0.7053, 3D IoU: 0.6987                                                        | 2D IoU: 0.7303, 3D IoU: 0.7217 |
|                                                                                     |    |    |    |                                |
|    | 2D IoU: 0.9386, 3D IoU: 0.9214                                                      |                                                                                     | 2D IoU: 0.8444, 3D IoU: 0.7476                                                        | 2D IoU: 0.8401, 3D IoU: 0.6939 |
|                                                                                     |    |    |    |                                |
|   | 2D IoU: 0.9472, 3D IoU: 0.9205                                                      |                                                                                     | 2D IoU: 0.7687, 3D IoU: 0.7551                                                        | 2D IoU: 0.7732, 3D IoU: 0.7679 |
|                                                                                     |  |  |  |                                |
|  | 2D IoU: 0.9452, 3D IoU: 0.9356                                                      |                                                                                     | 2D IoU: 0.5440, 3D IoU: 0.5404                                                        | 2D IoU: 0.5468, 3D IoU: 0.5439 |
|                                                                                     |  |  |  |                                |
|  | 2D IoU: 0.9333, 3D IoU: 0.9282                                                      |                                                                                     | 2D IoU: 0.5287, 3D IoU: 0.5281                                                        | 2D IoU: 0.7675, 3D IoU: 0.7613 |
|                                                                                     |  |  |  |                                |
| Input                                                                               | Ours                                                                                | LED <sup>2</sup> -Net                                                               | LGT-Net                                                                               |                                |

|                                                                                    |                                                                                     |                                                                                     |                                                                                       |
|------------------------------------------------------------------------------------|-------------------------------------------------------------------------------------|-------------------------------------------------------------------------------------|---------------------------------------------------------------------------------------|
|  | 2D IoU: 0.9284, 3D IoU: 0.9263                                                      | 2D IoU: 0.5645, 3D IoU: 0.5641                                                      | 2D IoU: 0.5577, 3D IoU: 0.5541                                                        |
|                                                                                    |    |    |    |
|                                                                                    | 2D IoU: 0.9232, 3D IoU: 0.9148                                                      | 2D IoU: 0.7662, 3D IoU: 0.7617                                                      | 2D IoU: 0.7331, 3D IoU: 0.7216                                                        |
|                                                                                    |    |    |    |
|                                                                                    | 2D IoU: 0.9222, 3D IoU: 0.9110                                                      | 2D IoU: 0.6266, 3D IoU: 0.6255                                                      | 2D IoU: 0.6203, 3D IoU: 0.6130                                                        |
|                                                                                    |  |  |  |
|                                                                                    | 2D IoU: 0.9395, 3D IoU: 0.9345                                                      | 2D IoU: 0.8026, 3D IoU: 0.7965                                                      | 2D IoU: 0.9186, 3D IoU: 0.9017                                                        |
|                                                                                    |  |  |  |
|                                                                                    | 2D IoU: 0.9341, 3D IoU: 0.9273                                                      | 2D IoU: 0.5846, 3D IoU: 0.5817                                                      | 2D IoU: 0.5882, 3D IoU: 0.5845                                                        |
|                                                                                    |  |  |  |
| Input                                                                              | Ours                                                                                | LED <sup>2</sup> -Net                                                               | LGT-Net                                                                               |

|                                                                                     |                                                                                     |                                                                                     |                                                                                       |
|-------------------------------------------------------------------------------------|-------------------------------------------------------------------------------------|-------------------------------------------------------------------------------------|---------------------------------------------------------------------------------------|
|   | 2D IoU: 0.9283, 3D IoU: 0.9261                                                      | 2D IoU: 0.5879, 3D IoU: 0.5790                                                      | 2D IoU: 0.6221, 3D IoU: 0.6101                                                        |
|                                                                                     |    |   |    |
|                                                                                     | 2D IoU: 0.9213, 3D IoU: 0.9180                                                      | 2D IoU: 0.9213, 3D IoU: 0.9209                                                      | 2D IoU: 0.8807, 3D IoU: 0.8793                                                        |
|                                                                                     |    |    |    |
|                                                                                     | 2D IoU: 0.9367, 3D IoU: 0.9254                                                      | 2D IoU: 0.9198, 3D IoU: 0.9191                                                      | 2D IoU: 0.9468, 3D IoU: 0.9342                                                        |
|                                                                                     |  |  |  |
|  | 2D IoU: 0.9257, 3D IoU: 0.9116                                                      | 2D IoU: 0.8387, 3D IoU: 0.8335                                                      | 2D IoU: 0.7741, 3D IoU: 0.7685                                                        |
|                                                                                     |  |  |  |
|                                                                                     | 2D IoU: 0.9652, 3D IoU: 0.9571                                                      | 2D IoU: 0.5728, 3D IoU: 0.5678                                                      | 2D IoU: 0.5794, 3D IoU: 0.5740                                                        |
|                                                                                     |  |  |  |
|                                                                                     |                                                                                     |                                                                                     |                                                                                       |
|                                                                                     |                                                                                     |                                                                                     |                                                                                       |
| Input                                                                               | Ours                                                                                | LED <sup>2</sup> -Net                                                               | LGT-Net                                                                               |

|                                                                                     |                                                                                     |                                                                                     |                                                                                       |
|-------------------------------------------------------------------------------------|-------------------------------------------------------------------------------------|-------------------------------------------------------------------------------------|---------------------------------------------------------------------------------------|
|    | 2D IoU: 0.9293, 3D IoU: 0.9154                                                      | 2D IoU: 0.6545, 3D IoU: 0.6508                                                      | 2D IoU: 0.6597, 3D IoU: 0.6559                                                        |
|                                                                                     |    |    |    |
|                                                                                     |                                                                                     |                                                                                     |                                                                                       |
|    | 2D IoU: 0.9425, 3D IoU: 0.9278                                                      | 2D IoU: 0.5432, 3D IoU: 0.5370                                                      | 2D IoU: 0.5284, 3D IoU: 0.5213                                                        |
|                                                                                     |    |    |    |
|                                                                                     |                                                                                     |                                                                                     |                                                                                       |
|    | 2D IoU: 0.9216, 3D IoU: 0.9156                                                      | 2D IoU: 0.8048, 3D IoU: 0.7955                                                      | 2D IoU: 0.8750, 3D IoU: 0.8522                                                        |
|                                                                                     |  |  |  |
|                                                                                     |                                                                                     |                                                                                     |                                                                                       |
|   | 2D IoU: 0.9225, 3D IoU: 0.9145                                                      | 2D IoU: 0.7528, 3D IoU: 0.7527                                                      | 2D IoU: 0.8156, 3D IoU: 0.7973                                                        |
|                                                                                     |  |  |  |
|                                                                                     |                                                                                     |                                                                                     |                                                                                       |
|  | 2D IoU: 0.9452, 3D IoU: 0.9337                                                      | 2D IoU: 0.5502, 3D IoU: 0.5475                                                      | 2D IoU: 0.3063, 3D IoU: 0.3052                                                        |
|                                                                                     |  |  |  |
|                                                                                     |                                                                                     |                                                                                     |                                                                                       |
|  |                                                                                     |                                                                                     |                                                                                       |
|                                                                                     |                                                                                     |                                                                                     |                                                                                       |
|                                                                                     |                                                                                     |                                                                                     |                                                                                       |
| Input                                                                               | Ours                                                                                | LED <sup>2</sup> -Net                                                               | LGT-Net                                                                               |

|                                                                                     |                                                                                     |                                                                                      |                                                                                       |
|-------------------------------------------------------------------------------------|-------------------------------------------------------------------------------------|--------------------------------------------------------------------------------------|---------------------------------------------------------------------------------------|
|    | 2D IoU: 0.9346, 3D IoU: 0.9173                                                      | 2D IoU: 0.6681, 3D IoU: 0.6443                                                       | 2D IoU: 0.6617, 3D IoU: 0.6521                                                        |
|                                                                                     |    |     |    |
|    | 2D IoU: 0.9334, 3D IoU: 0.9107                                                      | 2D IoU: 0.6169, 3D IoU: 0.5663                                                       | 2D IoU: 0.6402, 3D IoU: 0.5474                                                        |
|                                                                                     |    |     |    |
|   | 2D IoU: 0.9282, 3D IoU: 0.9271                                                      | 2D IoU: 0.5939, 3D IoU: 0.5938                                                       | 2D IoU: 0.5810, 3D IoU: 0.5804                                                        |
|                                                                                     |  |   |  |
|  | 2D IoU: 0.9257, 3D IoU: 0.9142                                                      | 2D IoU: 0.6425, 3D IoU: 0.6416                                                       | 2D IoU: 0.6330, 3D IoU: 0.6261                                                        |
|                                                                                     |  |  |  |
|  | 2D IoU: 0.9382, 3D IoU: 0.9312                                                      | 2D IoU: 0.6926, 3D IoU: 0.6854                                                       | 2D IoU: 0.6622, 3D IoU: 0.6562                                                        |
|                                                                                     |  |   |  |
| Input                                                                               | Ours                                                                                | LED <sup>2</sup> -Net                                                                | LGT-Net                                                                               |



|                                                                                     |                                                                                     |                                                                                     |                                                                                       |
|-------------------------------------------------------------------------------------|-------------------------------------------------------------------------------------|-------------------------------------------------------------------------------------|---------------------------------------------------------------------------------------|
|    | 2D IoU: 0.9271, 3D IoU: 0.9217                                                      | 2D IoU: 0.5292, 3D IoU: 0.5255                                                      | 2D IoU: 0.5603, 3D IoU: 0.5391                                                        |
|                                                                                     |    |    |    |
|    | 2D IoU: 0.9223, 3D IoU: 0.9037                                                      | 2D IoU: 0.6413, 3D IoU: 0.5476                                                      | 2D IoU: 0.3499, 3D IoU: 0.3135                                                        |
|                                                                                     |    |    |    |
|   | 2D IoU: 0.9426, 3D IoU: 0.9304                                                      | 2D IoU: 0.6282, 3D IoU: 0.6278                                                      | 2D IoU: 0.6557, 3D IoU: 0.6442                                                        |
|                                                                                     |  |  |  |
|  | 2D IoU: 0.9404, 3D IoU: 0.9250                                                      | 2D IoU: 0.7965, 3D IoU: 0.7215                                                      | 2D IoU: 0.8755, 3D IoU: 0.5584                                                        |
|                                                                                     |  |  |  |
|  | 2D IoU: 0.9606, 3D IoU: 0.9418                                                      | 2D IoU: 0.6020, 3D IoU: 0.5978                                                      | 2D IoU: 0.5753, 3D IoU: 0.5744                                                        |
|                                                                                     |  |  |  |
| Input                                                                               | Ours                                                                                | LED <sup>2</sup> -Net                                                               | LGT-Net                                                                               |

|                                                                                     |                                                                                     |                                                                                      |                                                                                       |
|-------------------------------------------------------------------------------------|-------------------------------------------------------------------------------------|--------------------------------------------------------------------------------------|---------------------------------------------------------------------------------------|
|    | 2D IoU: 0.9431, 3D IoU: 0.9096                                                      | 2D IoU: 0.6129, 3D IoU: 0.5920                                                       | 2D IoU: 0.5999, 3D IoU: 0.5841                                                        |
|                                                                                     |    |    |    |
|    | 2D IoU: 0.9280, 3D IoU: 0.9203                                                      | 2D IoU: 0.9004, 3D IoU: 0.8975                                                       | 2D IoU: 0.8837, 3D IoU: 0.8565                                                        |
|                                                                                     |    |     |    |
|   | 2D IoU: 0.9520, 3D IoU: 0.9506                                                      | 2D IoU: 0.9375, 3D IoU: 0.9339                                                       | 2D IoU: 0.9303, 3D IoU: 0.9218                                                        |
|                                                                                     |  |   |  |
|  | 2D IoU: 0.9283, 3D IoU: 0.9214                                                      | 2D IoU: 0.5898, 3D IoU: 0.5687                                                       | 2D IoU: 0.5924, 3D IoU: 0.5800                                                        |
|                                                                                     |  |   |  |
|  | 2D IoU: 0.9258, 3D IoU: 0.9255                                                      | 2D IoU: 0.5805, 3D IoU: 0.5730                                                       | 2D IoU: 0.5815, 3D IoU: 0.5737                                                        |
|                                                                                     |  |  |  |
| Input                                                                               | Ours                                                                                | LED <sup>2</sup> -Net                                                                | LGT-Net                                                                               |

|                                                                                     |                                                                                     |                                                                                      |                                                                                       |
|-------------------------------------------------------------------------------------|-------------------------------------------------------------------------------------|--------------------------------------------------------------------------------------|---------------------------------------------------------------------------------------|
|    | 2D IoU: 0.9473, 3D IoU: 0.9357                                                      | 2D IoU: 0.5609, 3D IoU: 0.5565                                                       | 2D IoU: 0.5390, 3D IoU: 0.5346                                                        |
|                                                                                     |    |     |    |
|    | 2D IoU: 0.9257, 3D IoU: 0.9126                                                      | 2D IoU: 0.5125, 3D IoU: 0.5051                                                       | 2D IoU: 0.5128, 3D IoU: 0.5063                                                        |
|                                                                                     |    |     |    |
|   | 2D IoU: 0.9210, 3D IoU: 0.8987                                                      | 2D IoU: 0.6941, 3D IoU: 0.6853                                                       | 2D IoU: 0.9249, 3D IoU: 0.9195                                                        |
|                                                                                     |  |   |  |
|  | 2D IoU: 0.9303, 3D IoU: 0.9273                                                      | 2D IoU: 0.5697, 3D IoU: 0.5681                                                       | 2D IoU: 0.5935, 3D IoU: 0.5904                                                        |
|                                                                                     |  |   |  |
|  | 2D IoU: 0.9264, 3D IoU: 0.8998                                                      | 2D IoU: 0.5760, 3D IoU: 0.5749                                                       | 2D IoU: 0.5901, 3D IoU: 0.5777                                                        |
|                                                                                     |  |  |  |
| Input                                                                               | Ours                                                                                | LED <sup>2</sup> -Net                                                                | LGT-Net                                                                               |

|                                                                                    |                                                                                     |                                                                                     |                                                                                       |
|------------------------------------------------------------------------------------|-------------------------------------------------------------------------------------|-------------------------------------------------------------------------------------|---------------------------------------------------------------------------------------|
|   | 2D IoU: 0.9214, 3D IoU: 0.9129                                                      | 2D IoU: 0.6037, 3D IoU: 0.6034                                                      | 2D IoU: 0.5863, 3D IoU: 0.5814                                                        |
|                                                                                    |    |    |    |
|                                                                                    |                                                                                     |                                                                                     |                                                                                       |
|   | 2D IoU: 0.9527, 3D IoU: 0.9411                                                      | 2D IoU: 0.7239, 3D IoU: 0.7188                                                      | 2D IoU: 0.7560, 3D IoU: 0.7506                                                        |
|                                                                                    |    |    |    |
|                                                                                    |                                                                                     |                                                                                     |                                                                                       |
|   | 2D IoU: 0.9370, 3D IoU: 0.9217                                                      | 2D IoU: 0.7986, 3D IoU: 0.7900                                                      | 2D IoU: 0.2035, 3D IoU: 0.2035                                                        |
|                                                                                    |   |   |   |
|                                                                                    |                                                                                     |                                                                                     |                                                                                       |
|   | 2D IoU: 0.9627, 3D IoU: 0.9566                                                      | 2D IoU: 0.6185, 3D IoU: 0.6151                                                      | 2D IoU: 0.6638, 3D IoU: 0.6567                                                        |
|                                                                                    |  |  |  |
|                                                                                    |                                                                                     |                                                                                     |                                                                                       |
|  | 2D IoU: 0.9419, 3D IoU: 0.9313                                                      | 2D IoU: 0.5779, 3D IoU: 0.5748                                                      | 2D IoU: 0.5634, 3D IoU: 0.5579                                                        |
|                                                                                    |  |  |  |
|                                                                                    |                                                                                     |                                                                                     |                                                                                       |
| Input                                                                              | Ours                                                                                | LED <sup>2</sup> -Net                                                               | LGT-Net                                                                               |

|                                                                                    |                                                                                     |                                                                                      |                                                                                       |
|------------------------------------------------------------------------------------|-------------------------------------------------------------------------------------|--------------------------------------------------------------------------------------|---------------------------------------------------------------------------------------|
|  | 2D IoU: 0.9405, 3D IoU: 0.9273                                                      | 2D IoU: 0.6718, 3D IoU: 0.6688                                                       | 2D IoU: 0.7019, 3D IoU: 0.6946                                                        |
|                                                                                    |    |     |    |
|                                                                                    | 2D IoU: 0.9292, 3D IoU: 0.9056                                                      | 2D IoU: 0.8583, 3D IoU: 0.7641                                                       | 2D IoU: 0.8840, 3D IoU: 0.7208                                                        |
|                                                                                    |    |     |    |
|                                                                                    | 2D IoU: 0.9657, 3D IoU: 0.9654                                                      | 2D IoU: 0.8181, 3D IoU: 0.8103                                                       | 2D IoU: 0.5148, 3D IoU: 0.5133                                                        |
|                                                                                    |  |   |   |
|                                                                                    | 2D IoU: 0.9463, 3D IoU: 0.9245                                                      | 2D IoU: 0.9246, 3D IoU: 0.8983                                                       | 2D IoU: 0.9208, 3D IoU: 0.9158                                                        |
|                                                                                    |  |  |  |
|                                                                                    | 2D IoU: 0.9275, 3D IoU: 0.9183                                                      | 2D IoU: 0.5813, 3D IoU: 0.5725                                                       | 2D IoU: 0.5758, 3D IoU: 0.5674                                                        |
|                                                                                    |  |   |  |
| Input                                                                              | Ours                                                                                | LED <sup>2</sup> -Net                                                                | LGT-Net                                                                               |

|                                                                                     |                                                                                     |                                                                                     |                                                                                       |
|-------------------------------------------------------------------------------------|-------------------------------------------------------------------------------------|-------------------------------------------------------------------------------------|---------------------------------------------------------------------------------------|
|    | 2D IoU: 0.9257, 3D IoU: 0.9139                                                      | 2D IoU: 0.6252, 3D IoU: 0.6203                                                      | 2D IoU: 0.6350, 3D IoU: 0.6263                                                        |
|                                                                                     |    |    |    |
|                                                                                     |                                                                                     |                                                                                     |                                                                                       |
|    | 2D IoU: 0.9502, 3D IoU: 0.9391                                                      | 2D IoU: 0.6511, 3D IoU: 0.6449                                                      | 2D IoU: 0.6484, 3D IoU: 0.6449                                                        |
|                                                                                     |    |    |    |
|                                                                                     |                                                                                     |                                                                                     |                                                                                       |
|   | 2D IoU: 0.9304, 3D IoU: 0.9060                                                      | 2D IoU: 0.5788, 3D IoU: 0.5652                                                      | 2D IoU: 0.5843, 3D IoU: 0.5820                                                        |
|                                                                                     |  |   |   |
|                                                                                     |                                                                                     |                                                                                     |                                                                                       |
|  | 2D IoU: 0.9355, 3D IoU: 0.9338                                                      | 2D IoU: 0.4737, 3D IoU: 0.4710                                                      | 2D IoU: 0.4292, 3D IoU: 0.4287                                                        |
|                                                                                     |  |  |  |
|                                                                                     |                                                                                     |                                                                                     |                                                                                       |
|  | 2D IoU: 0.9320, 3D IoU: 0.9166                                                      | 2D IoU: 0.8202, 3D IoU: 0.8145                                                      | 2D IoU: 0.6085, 3D IoU: 0.6065                                                        |
|                                                                                     |  |  |  |
|                                                                                     |                                                                                     |                                                                                     |                                                                                       |
| Input                                                                               | Ours                                                                                | LED <sup>2</sup> -Net                                                               | LGT-Net                                                                               |



|                                                                                     |                                                                                     |                                                                                     |                                                                                       |                                |  |  |
|-------------------------------------------------------------------------------------|-------------------------------------------------------------------------------------|-------------------------------------------------------------------------------------|---------------------------------------------------------------------------------------|--------------------------------|--|--|
|    | 2D IoU: 0.9310, 3D IoU: 0.9280                                                      |                                                                                     | 2D IoU: 0.7250, 3D IoU: 0.7181                                                        | 2D IoU: 0.7636, 3D IoU: 0.7407 |  |  |
|                                                                                     |    |    |    |                                |  |  |
|    | 2D IoU: 0.9331, 3D IoU: 0.9255                                                      |                                                                                     | 2D IoU: 0.6023, 3D IoU: 0.6009                                                        | 2D IoU: 0.5934, 3D IoU: 0.5786 |  |  |
|                                                                                     |    |    |    |                                |  |  |
|    | 2D IoU: 0.9252, 3D IoU: 0.9249                                                      |                                                                                     | 2D IoU: 0.6525, 3D IoU: 0.6524                                                        | 2D IoU: 0.6790, 3D IoU: 0.6780 |  |  |
|                                                                                     |  |  |  |                                |  |  |
|    | 2D IoU: 0.9349, 3D IoU: 0.9082                                                      |                                                                                     | 2D IoU: 0.5993, 3D IoU: 0.5866                                                        | 2D IoU: 0.5831, 3D IoU: 0.5625 |  |  |
|                                                                                     |  |  |  |                                |  |  |
|   | 2D IoU: 0.9329, 3D IoU: 0.9148                                                      |                                                                                     | 2D IoU: 0.6509, 3D IoU: 0.6424                                                        | 2D IoU: 0.7417, 3D IoU: 0.7239 |  |  |
|                                                                                     |  |  |  |                                |  |  |
|  |                                                                                     |                                                                                     |                                                                                       |                                |  |  |
|  |                                                                                     |                                                                                     |                                                                                       |                                |  |  |
|  |                                                                                     |                                                                                     |                                                                                       |                                |  |  |
|  |                                                                                     |                                                                                     |                                                                                       |                                |  |  |
|  |                                                                                     |                                                                                     |                                                                                       |                                |  |  |
| Input                                                                               | Ours                                                                                | LED <sup>2</sup> -Net                                                               | LGT-Net                                                                               |                                |  |  |

|                                                                                     |                                                                                     |                                                                                      |                                                                                       |
|-------------------------------------------------------------------------------------|-------------------------------------------------------------------------------------|--------------------------------------------------------------------------------------|---------------------------------------------------------------------------------------|
|    | 2D IoU: 0.9232, 3D IoU: 0.9153                                                      | 2D IoU: 0.8357, 3D IoU: 0.8294                                                       | 2D IoU: 0.8536, 3D IoU: 0.8435                                                        |
|                                                                                     |    |     |    |
|                                                                                     |                                                                                     |                                                                                      |                                                                                       |
|    | 2D IoU: 0.9496, 3D IoU: 0.9462                                                      | 2D IoU: 0.5835, 3D IoU: 0.5835                                                       | 2D IoU: 0.5825, 3D IoU: 0.5809                                                        |
|                                                                                     |    |     |    |
|                                                                                     |                                                                                     |                                                                                      |                                                                                       |
|    | 2D IoU: 0.9303, 3D IoU: 0.9230                                                      | 2D IoU: 0.7153, 3D IoU: 0.7115                                                       | 2D IoU: 0.3555, 3D IoU: 0.3539                                                        |
|                                                                                     |  |  |  |
|                                                                                     |                                                                                     |                                                                                      |                                                                                       |
|   | 2D IoU: 0.9334, 3D IoU: 0.9290                                                      | 2D IoU: 0.9071, 3D IoU: 0.8923                                                       | 2D IoU: 0.8017, 3D IoU: 0.7807                                                        |
|                                                                                     |  |  |  |
|                                                                                     |                                                                                     |                                                                                      |                                                                                       |
|  | 2D IoU: 0.9251, 3D IoU: 0.9108                                                      | 2D IoU: 0.5732, 3D IoU: 0.5717                                                       | 2D IoU: 0.2499, 3D IoU: 0.2475                                                        |
|                                                                                     |  |   |  |
|                                                                                     |                                                                                     |                                                                                      |                                                                                       |
|  |                                                                                     |                                                                                      |                                                                                       |
|                                                                                     |                                                                                     |                                                                                      |                                                                                       |
|                                                                                     |                                                                                     |                                                                                      |                                                                                       |
| Input                                                                               | Ours                                                                                | LED <sup>2</sup> -Net                                                                | LGT-Net                                                                               |
